# Supplementary material for: Robust SiZer Approach for Varying Coefficient Models
Source: Hindawi journal article supplement (doi:10.1155/2013/547874), 2013-01-01
Supplement: f1 [file 547874.f1.pdf]

## The supplementary materials for "Robust SiZer approach for varying coefficient models"

The full version of local LAD-based robust SiZer plots and the local least-squares-based SiZer plots .

### Figure Captions

**Figure 1.** Model errors drawn from the normal distribution  $N(0, 0.5^2)$  in the varying coefficient model, the robust SiZer maps of (a)  $\beta_1(u)$  and (b)  $\beta_2(u)$  in Group 1, and the local least-square-based SiZer map of (c)  $\beta_1(u)$  and (d)  $\beta_2(u)$  in Group 1.

**Figure 2.** Model errors drawn from the normal distribution  $N(0, 0.5^2)$  in the varying coefficient model, the robust SiZer maps of (a)  $\beta_1(u)$  and (b)  $\beta_2(u)$  in Group 2, and the local least-square-based SiZer map of (c)  $\beta_1(u)$  and (d)  $\beta_2(u)$  in Group 2.

**Figure 3.** Model errors drawn from the normal distribution  $N(0, 0.5^2)$  in the varying coefficient model, the robust SiZer maps of (a)  $\beta_1(u)$  and (b)  $\beta_2(u)$  in Group 3, and the local least-square-based SiZer map of (c)  $\beta_1(u)$  and (d)  $\beta_2(u)$  in Group 3.

**Figure 4.** Model errors drawn from the cauchy distribution  $C(0, 0.2)$  in the varying coefficient model, the robust SiZer maps of (a)  $\beta_1(u)$  and (b)  $\beta_2(u)$  in Group 1, and the local least-square-based SiZer map of (c)  $\beta_1(u)$  and (d)  $\beta_2(u)$  in Group 1.

**Figure 5.** Model errors drawn from the cauchy distribution  $C(0, 0.2)$  in the varying coefficient model, the robust SiZer maps of (a)  $\beta_1(u)$  and (b)  $\beta_2(u)$  in Group 2, and the local least-square-based SiZer map of (c)  $\beta_1(u)$  and (d)  $\beta_2(u)$  in Group 2 .

**Figure 6.** Model errors drawn from the cauchy distribution  $C(0, 0.2)$  in the varying coefficient model, the robust SiZer maps of (a)  $\beta_1(u)$  and (b)  $\beta_2(u)$  in Group 3, and the local least-square-based SiZer map of (c)  $\beta_1(u)$  and (d)  $\beta_2(u)$  in Group 3.

**Figure 7.** Model errors drawn from the contaminated normal distribution  $0.7N(0, 0.5^2) + 0.3N(0, 16^2)$  in the varying coefficient model, the robust SiZer maps of (a)  $\beta_1(u)$  and (b)  $\beta_2(u)$  in Group 1, and the local least-square-based SiZer map of (c)  $\beta_1(u)$  and (d)  $\beta_2(u)$  in Group 1.

**Figure 8.** Model errors drawn from the contaminated normal distribution  $0.7N(0, 0.5^2) + 0.3N(0, 16^2)$  in the varying coefficient model, the robust SiZer maps of (a)  $\beta_1(u)$  and (b)  $\beta_2(u)$  in Group 2, and the local least-square-based SiZer map of (c)  $\beta_1(u)$  and (d)  $\beta_2(u)$  in Group 2.

**Figure 9.** Model errors drawn from the contaminated normal distribution  $0.7N(0, 0.5^2) + 0.3N(0, 16^2)$  in the varying coefficient model, the robust SiZer maps of (a)  $\beta_1(u)$  and (b)  $\beta_2(u)$  in Group 3, and the local least-square-based SiZer map of (c)  $\beta_1(u)$  and (d)  $\beta_2(u)$  in Group 3.

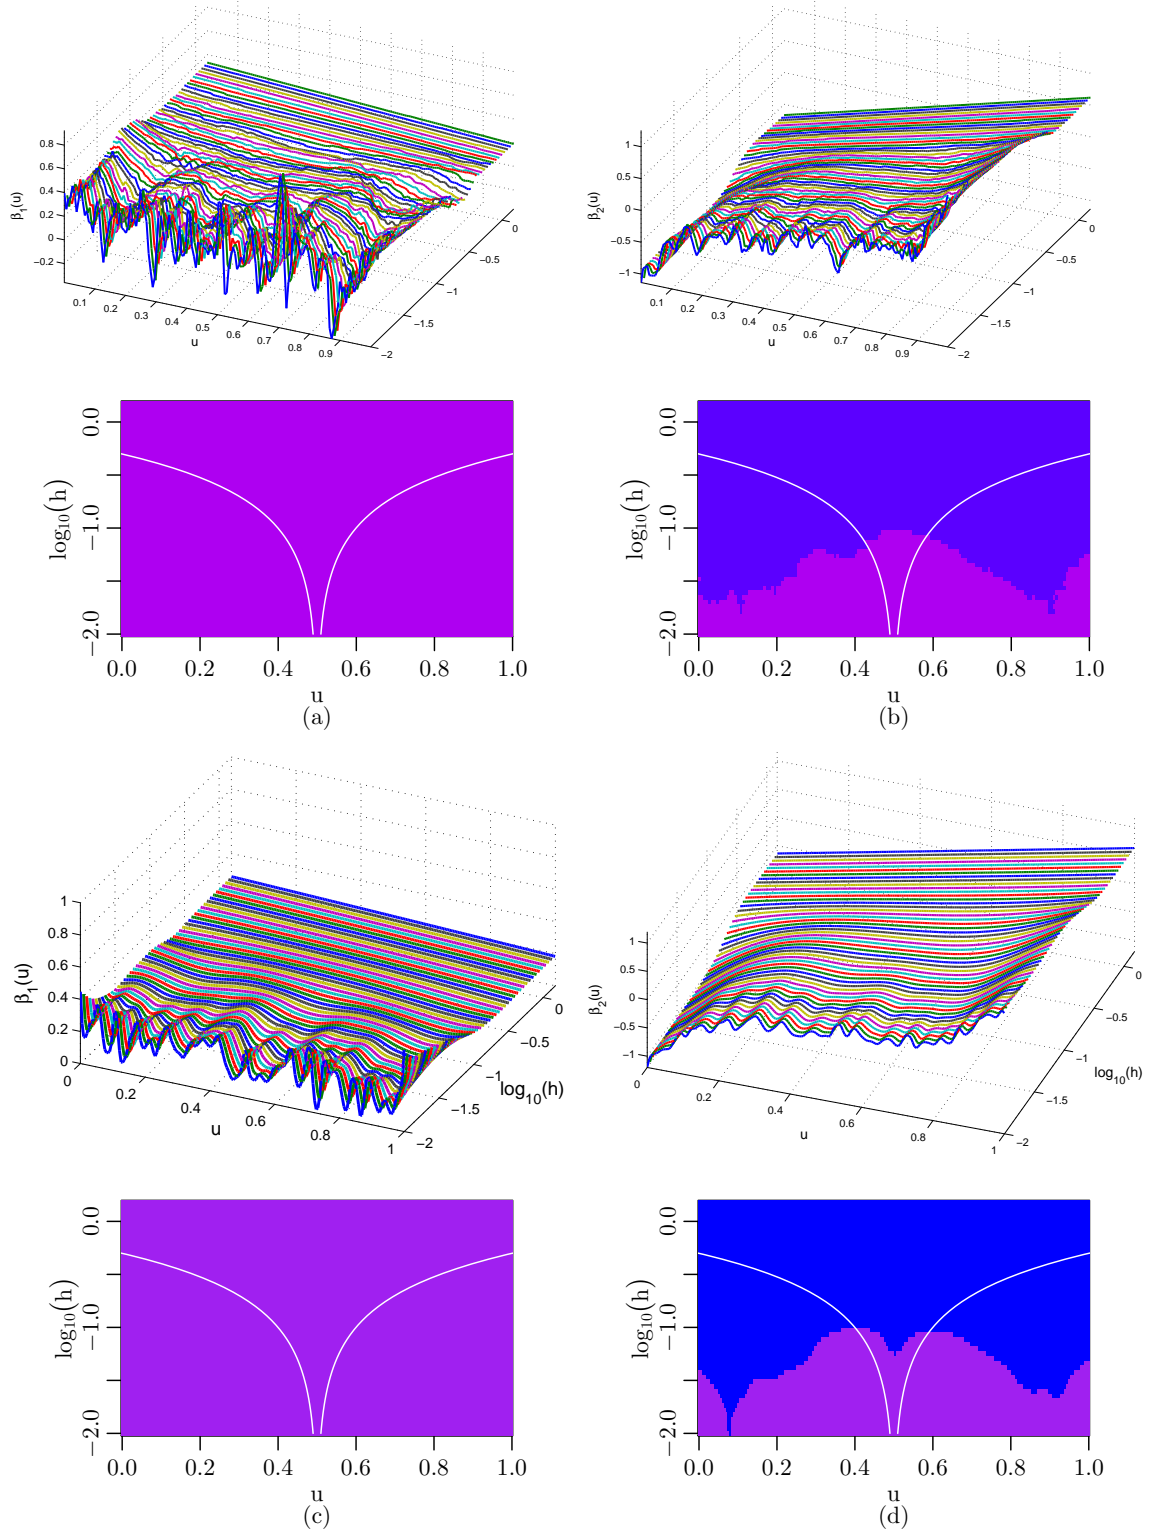

Figure S.1: Model errors drawn from the normal distribution  $N(0, 0.5^2)$  in the varying coefficient model, the robust SiZer maps of (a)  $\beta_1(u)$  and (b)  $\beta_2(u)$  in Group 1, and the local least-square-based SiZer map of (c)  $\beta_1(u)$  and (d)  $\beta_2(u)$  in Group 1 .

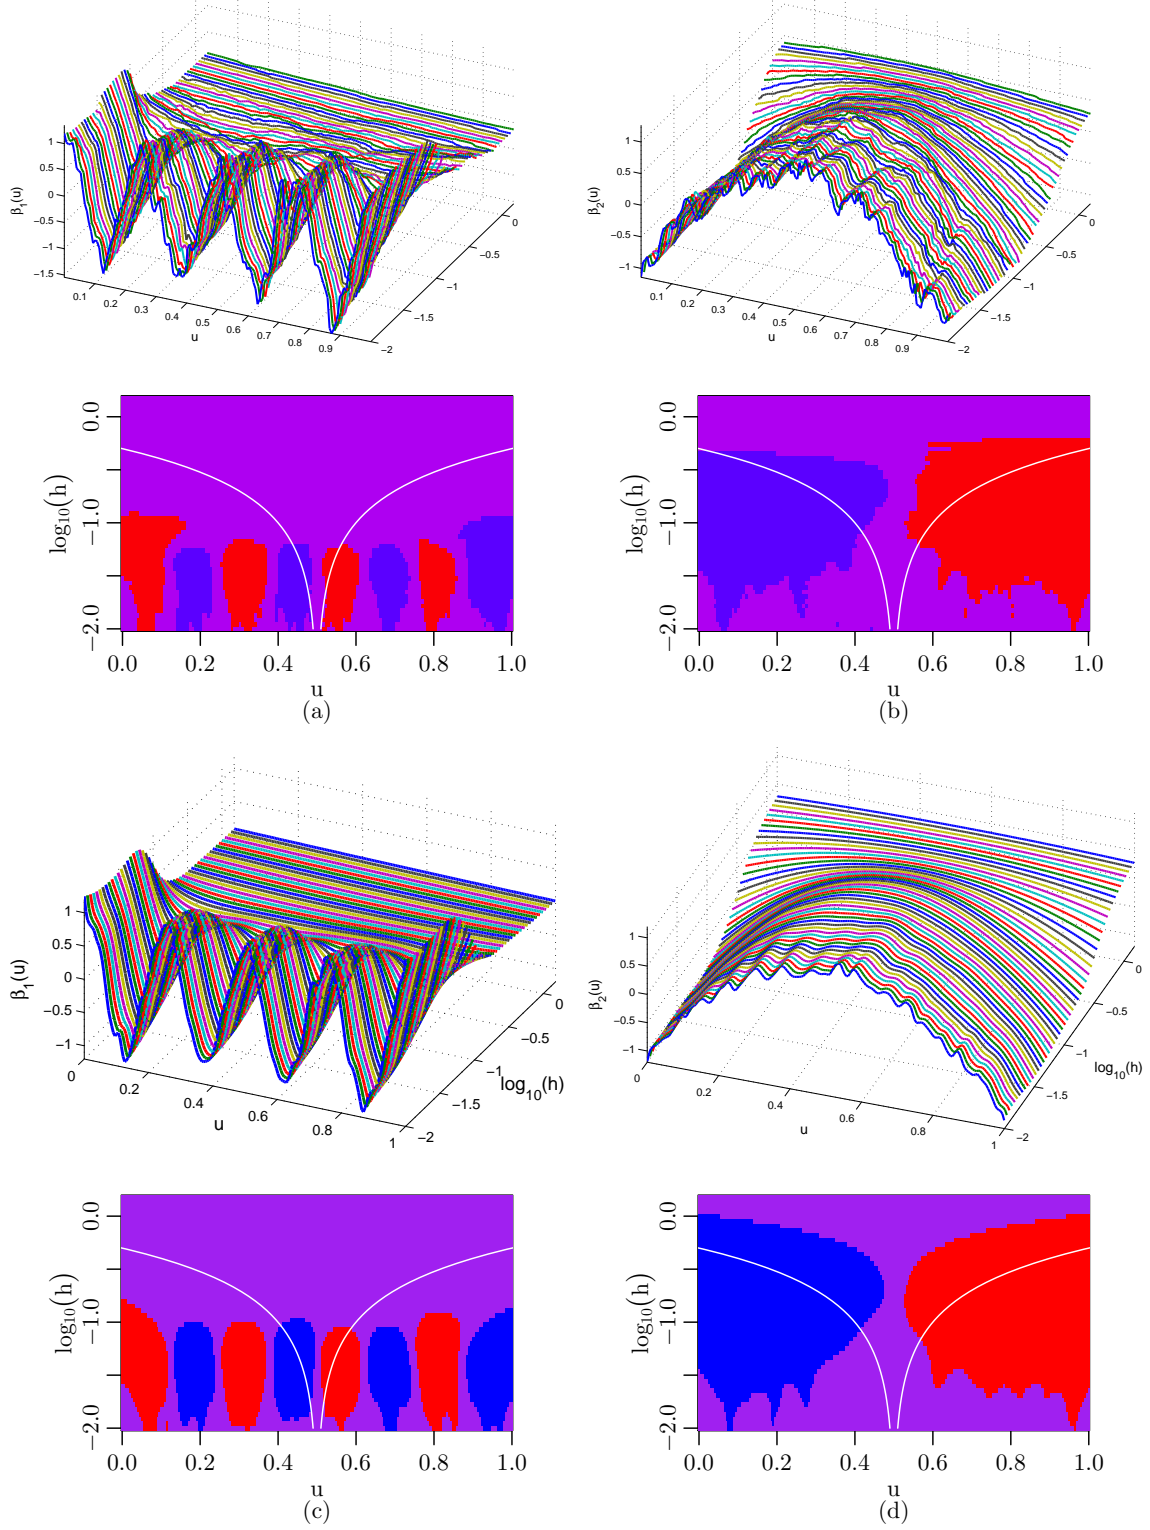

Figure S.2: Model errors drawn from the normal distribution  $N(0, 0.5^2)$  in the varying coefficient model, the robust SiZer maps of (a)  $\beta_1(u)$  and (b)  $\beta_2(u)$  in Group 2, and the local least-square-based SiZer map of (c)  $\beta_1(u)$  and (d)  $\beta_2(u)$  in Group 2 .

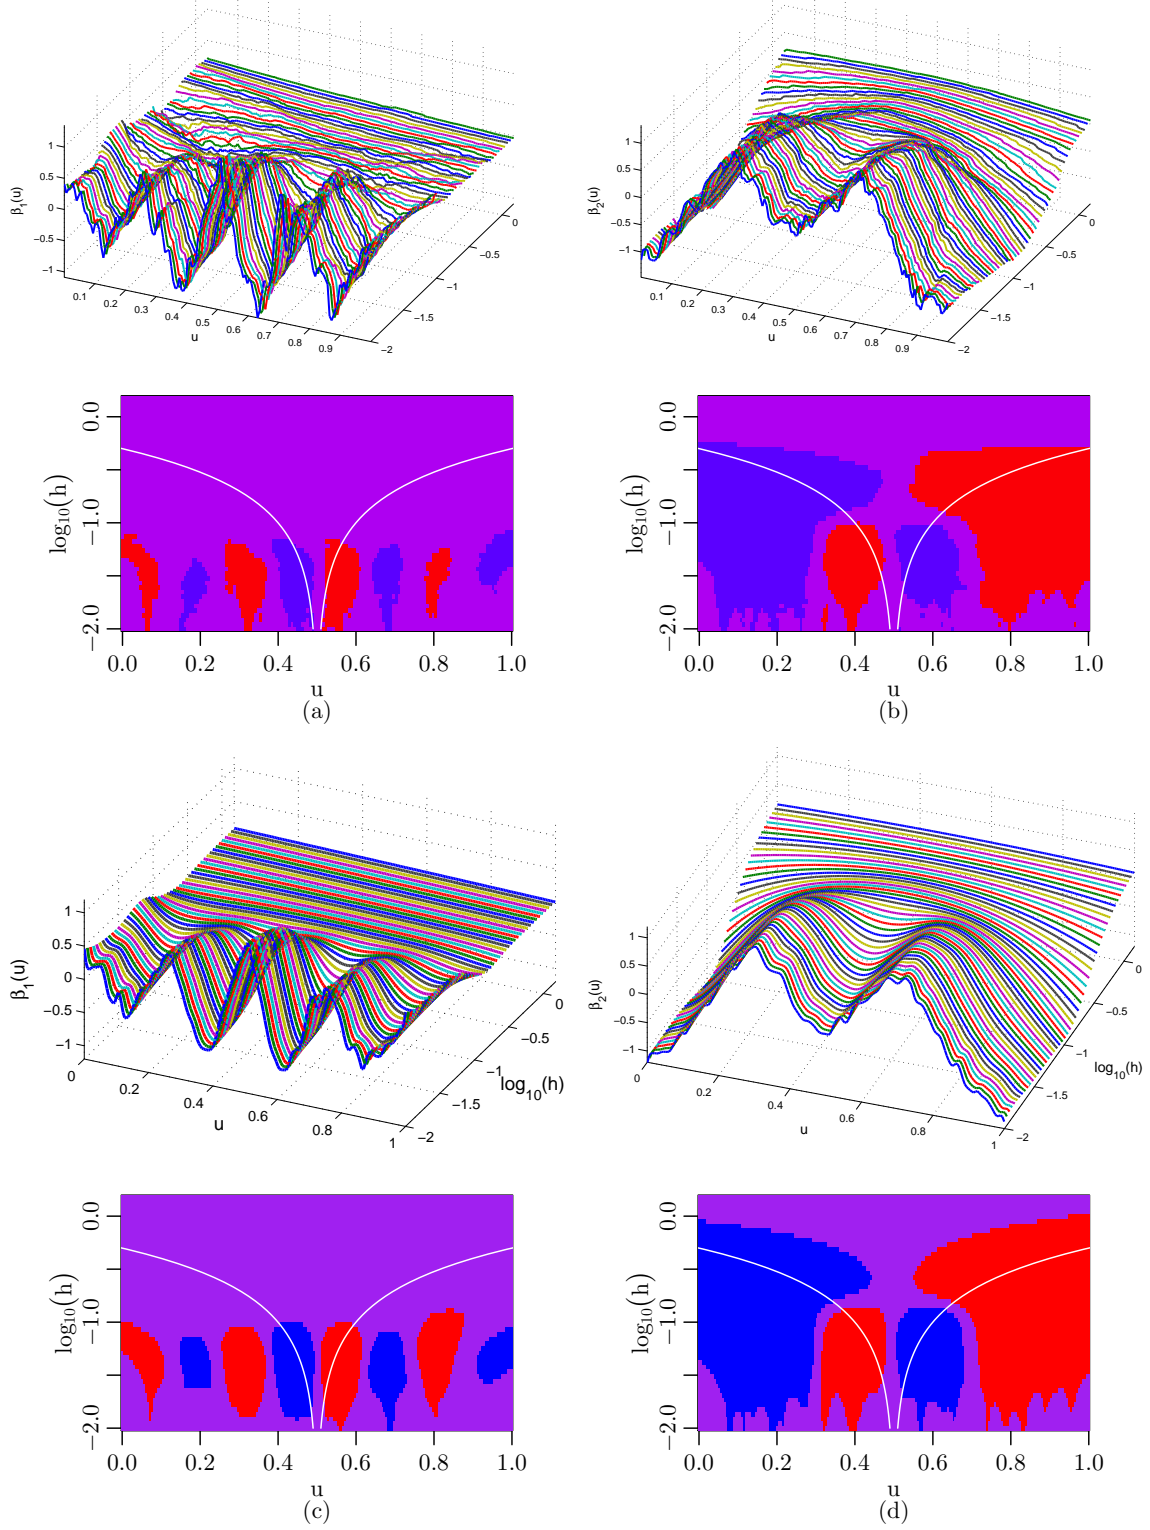

Figure S.3: Model errors drawn from the normal distribution  $N(0, 0.5^2)$  in the varying coefficient model, the robust SiZer maps of (a)  $\beta_1(u)$  and (b)  $\beta_2(u)$  in Group 3, and the local least-square-based SiZer map of (c)  $\beta_1(u)$  and (d)  $\beta_2(u)$  in Group 3 .

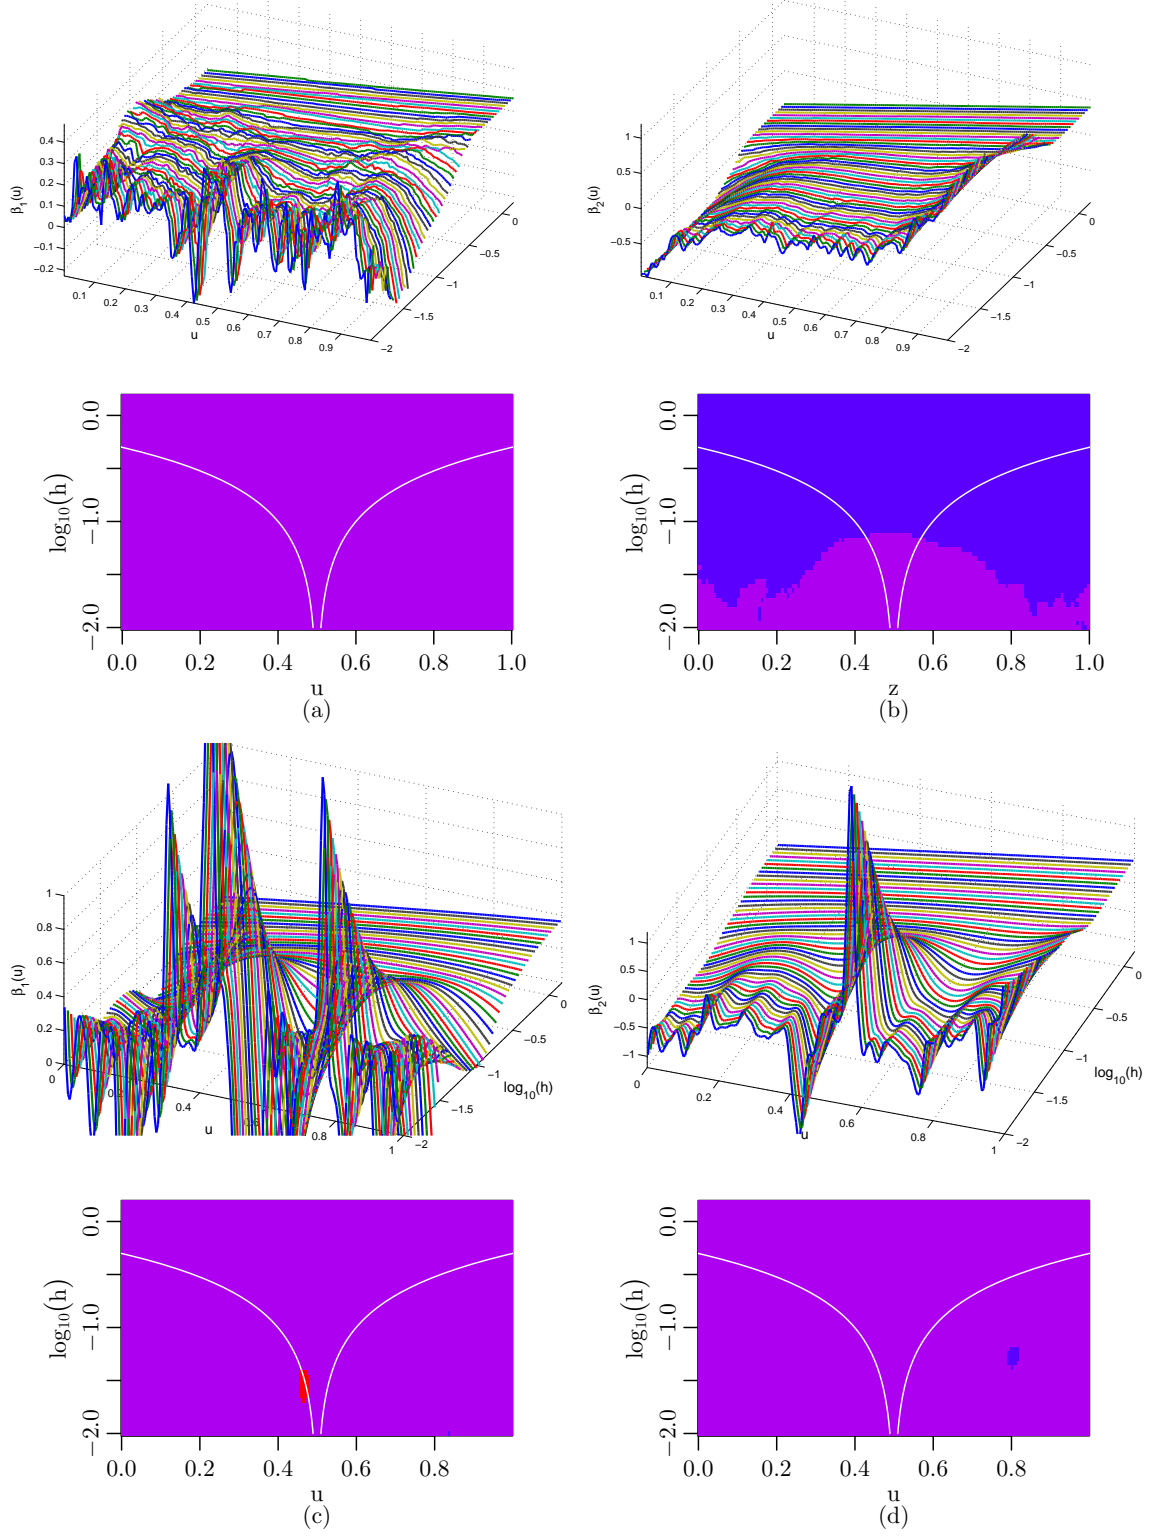

Figure S.4: Model errors drawn from the cauchy distribution  $C(0, 0.2)$  in the varying coefficient model, the robust SiZer maps of (a)  $\beta_1(u)$  and (b)  $\beta_2(u)$  in Group 1, and the local least-square-based SiZer map of (c)  $\beta_1(u)$  and (d)  $\beta_2(u)$  in Group 1 .



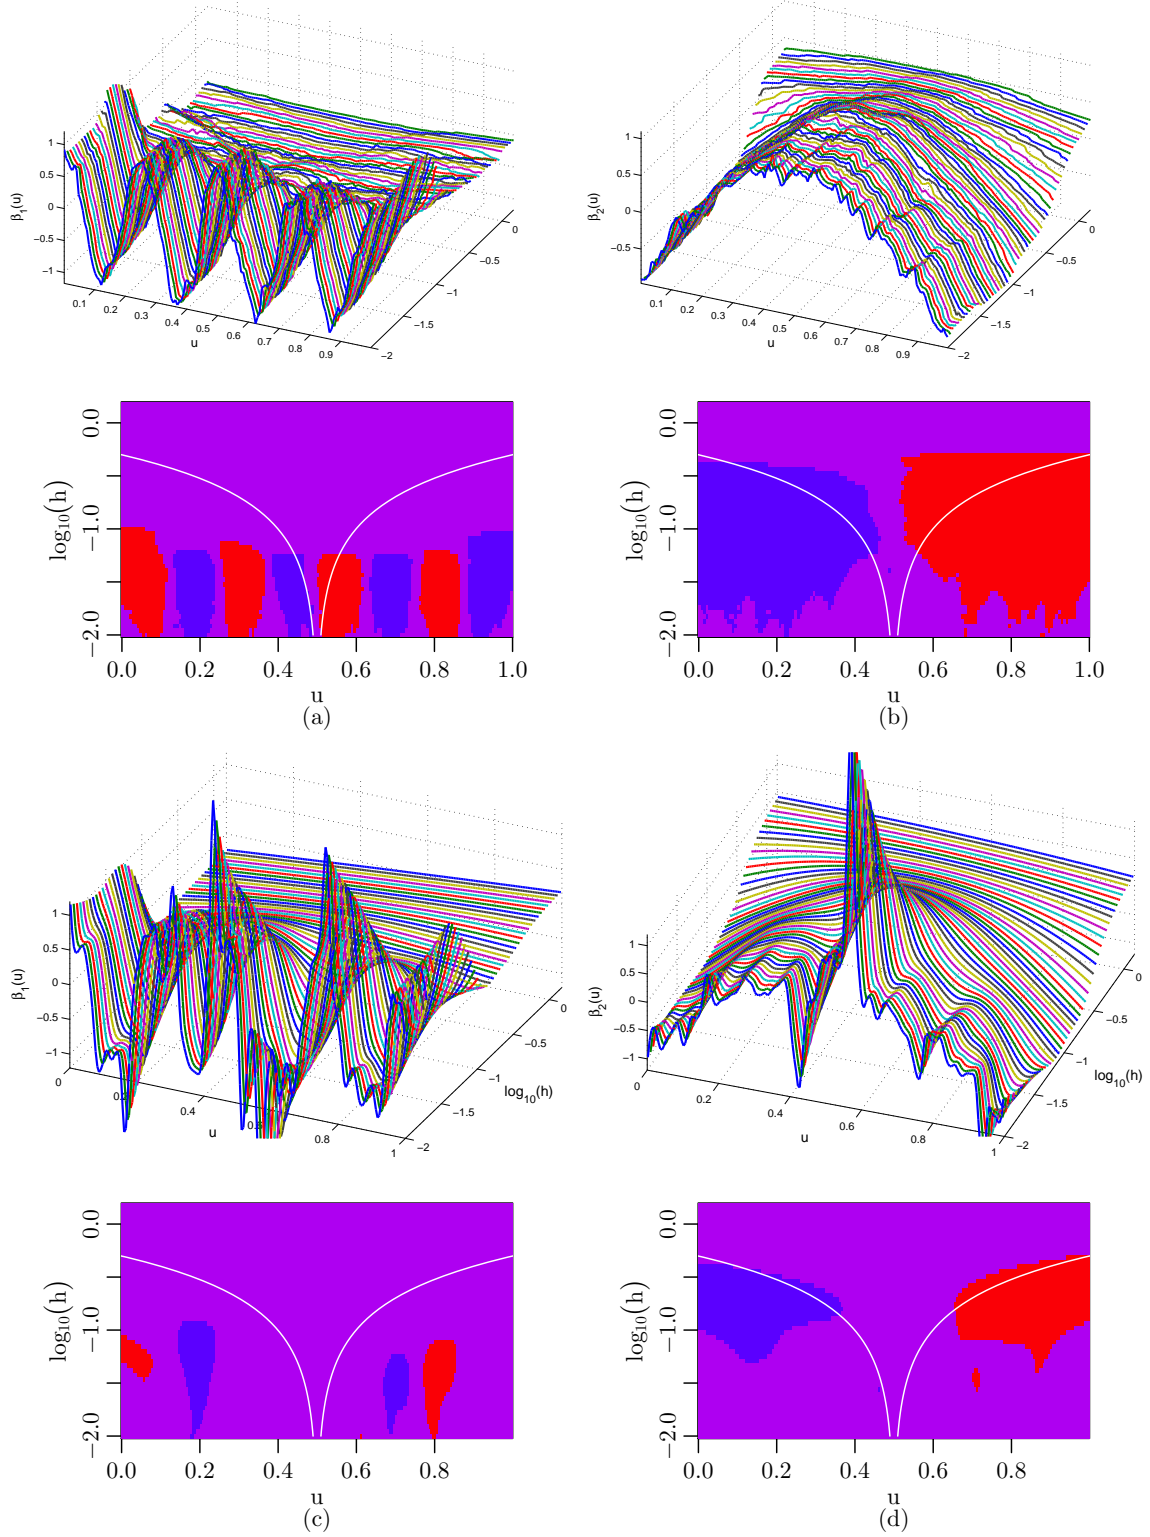

Figure S.5: Model errors drawn from the cauchy distribution  $C(0,0.2)$  in the varying coefficient model, the robust SiZer maps of (a)  $\beta_1(u)$  and (b)  $\beta_2(u)$  in Group 2, and the local least-square-based SiZer map of (c)  $\beta_1(u)$  and (d)  $\beta_2(u)$  in Group 2 .

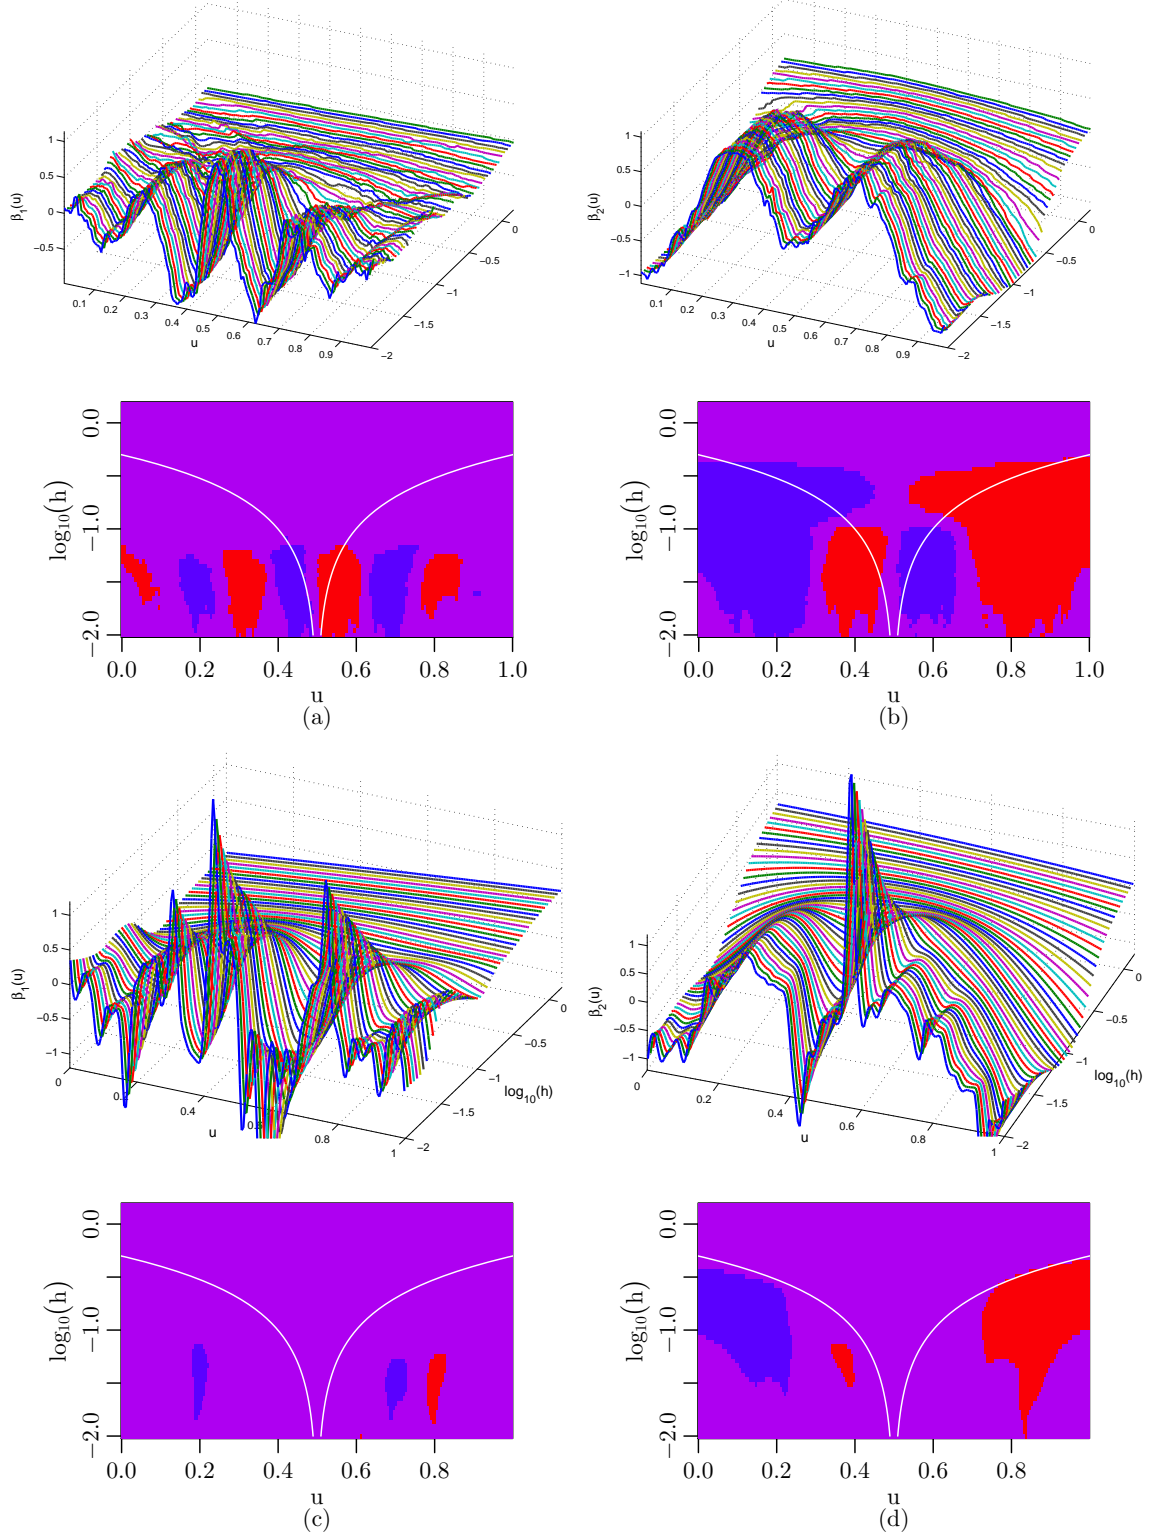

Figure S.6: Model errors drawn from the cauchy distribution  $C(0, 0.2)$  in the varying coefficient model, the robust SiZer maps of (a)  $\beta_1(u)$  and (b)  $\beta_2(u)$  in Group 3, and the local least-square-based SiZer map of (c)  $\beta_1(u)$  and (d)  $\beta_2(u)$  in Group 3 .

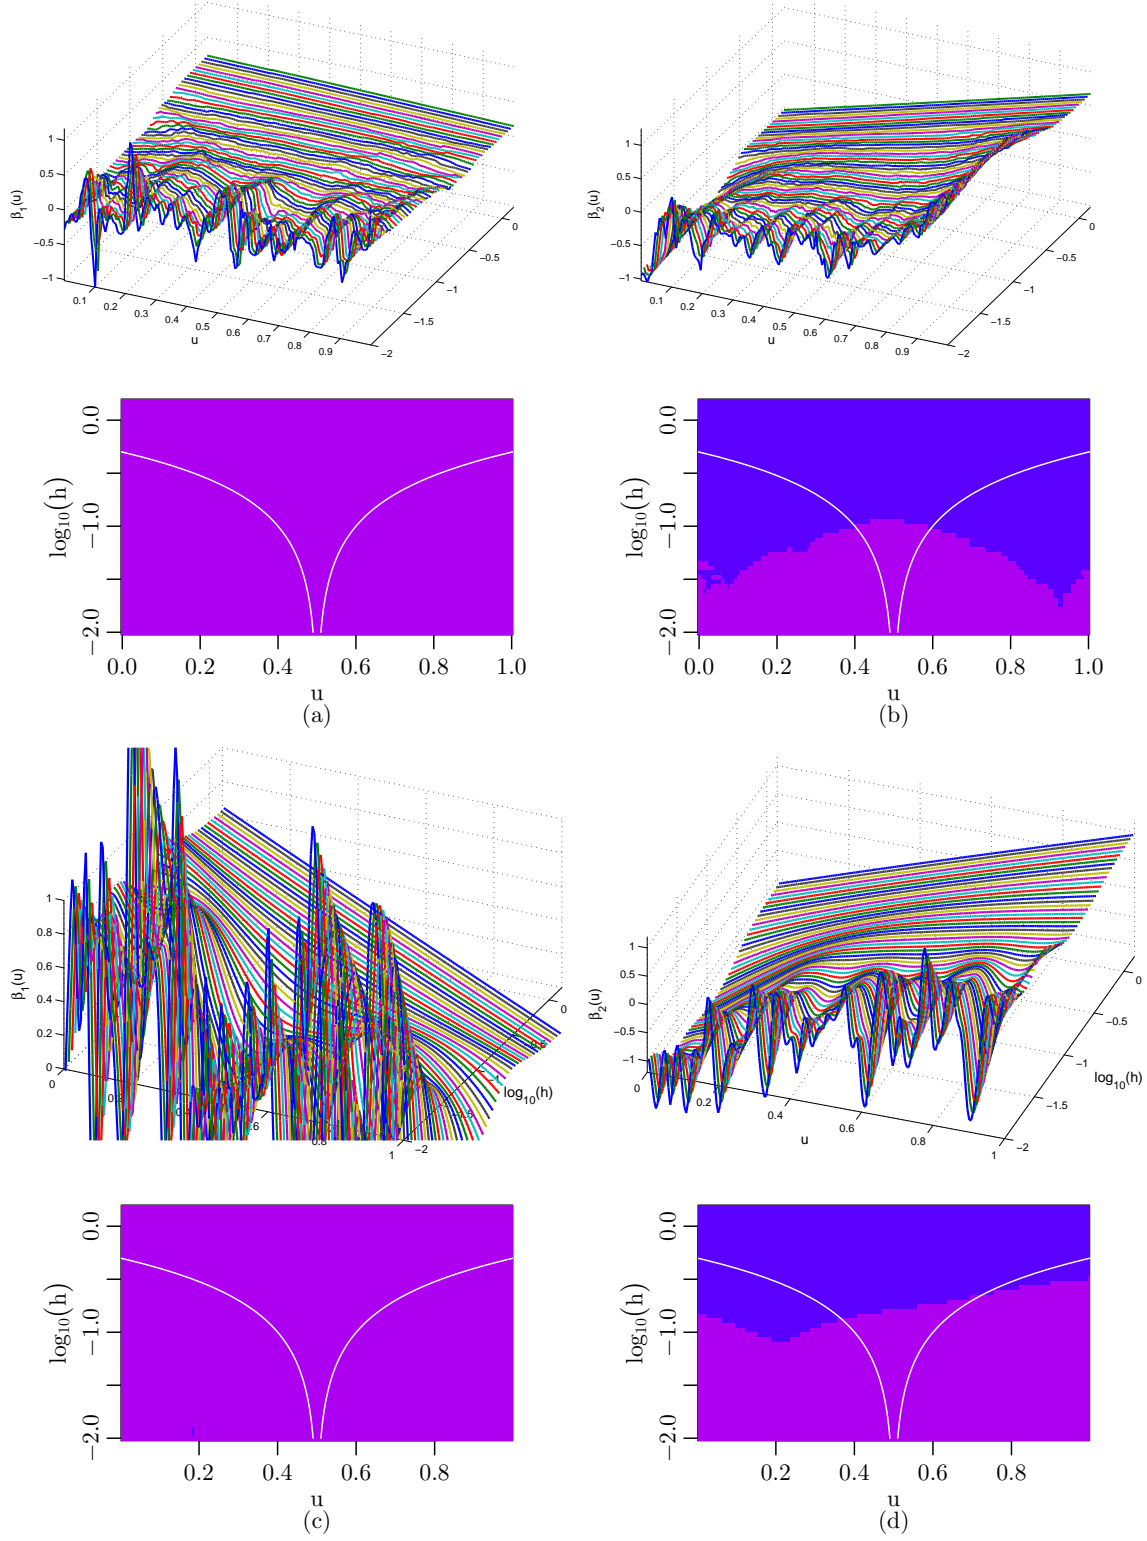

Figure S.7: Model errors drawn from the contaminated normal distribution  $0.7N(0, 0.5^2) + 0.3N(0, 16^2)$  in the varying coefficient model, the robust SiZer maps of (a)  $\beta_1(u)$  and (b)  $\beta_2(u)$  in Group 1, and the local least-square-based SiZer map of (c)  $\beta_1(u)$  and (d)  $\beta_2(u)$  in Group 1 .



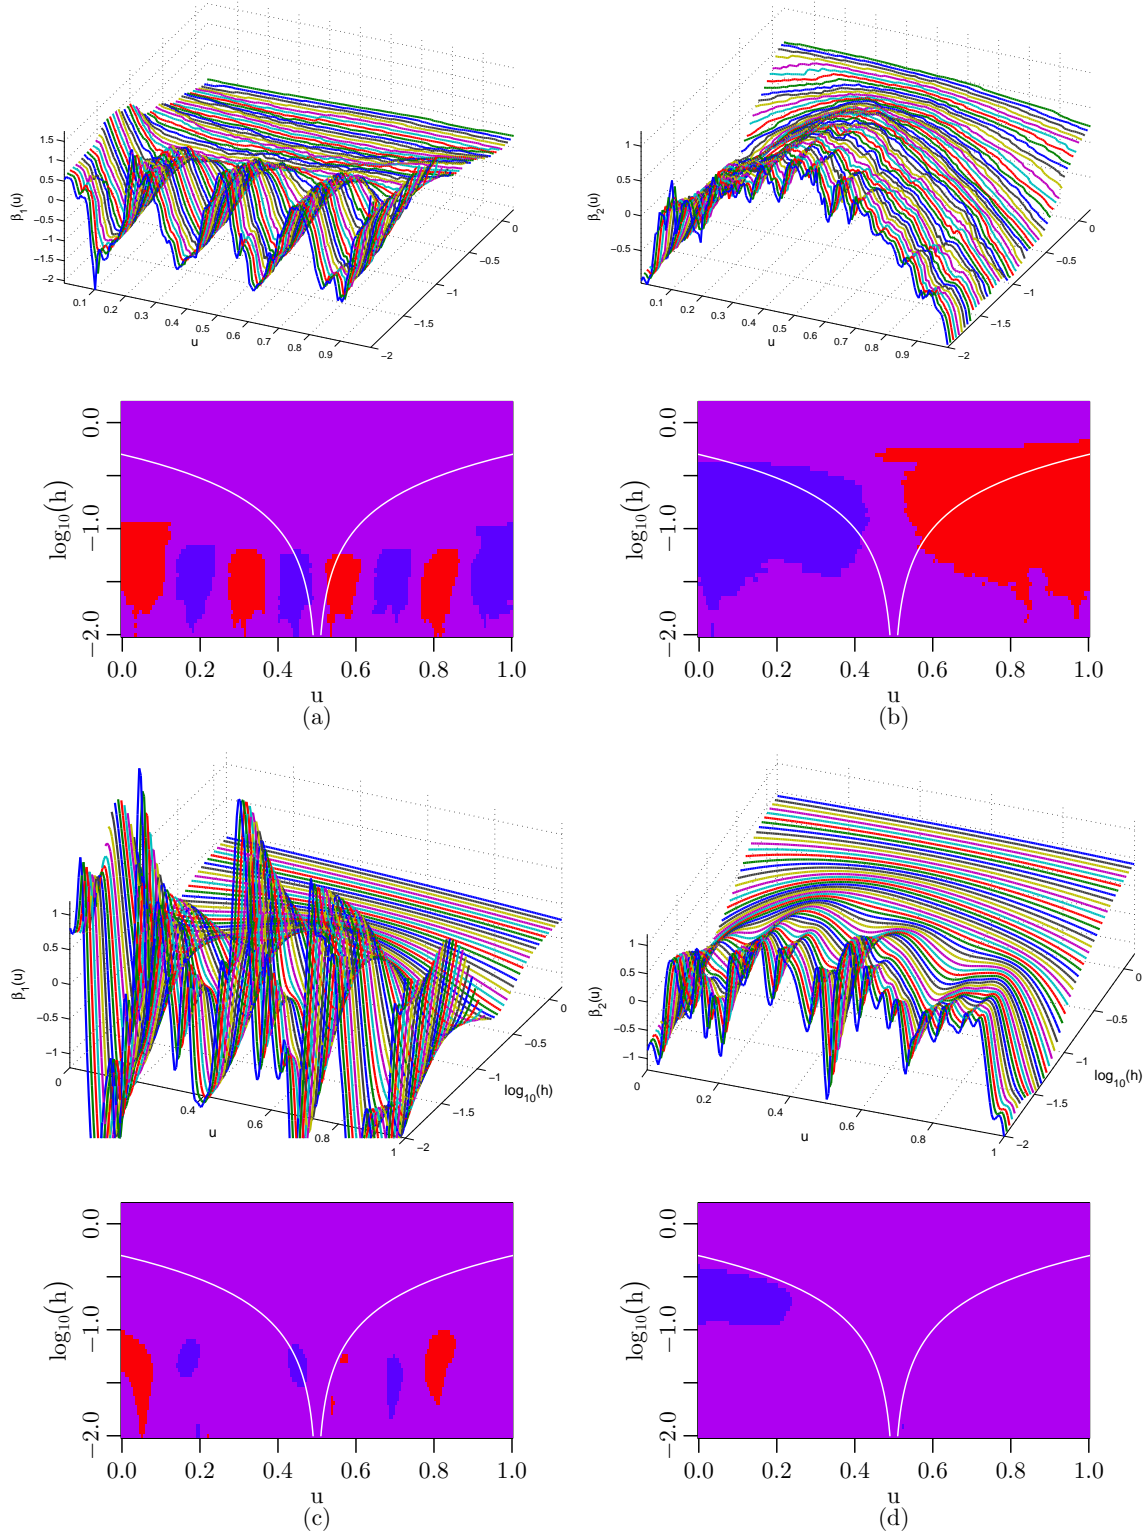

Figure S.8: Model errors drawn from the contaminated normal distribution  $0.7N(0, 0.5^2) + 0.3N(0, 16^2)$  in the varying coefficient model, the robust SiZer maps of (a)  $\beta_1(u)$  and (b)  $\beta_2(u)$  in Group 2, and the local least-square-based SiZer map of (c)  $\beta_1(u)$  and (d)  $\beta_2(u)$  in Group 2 .

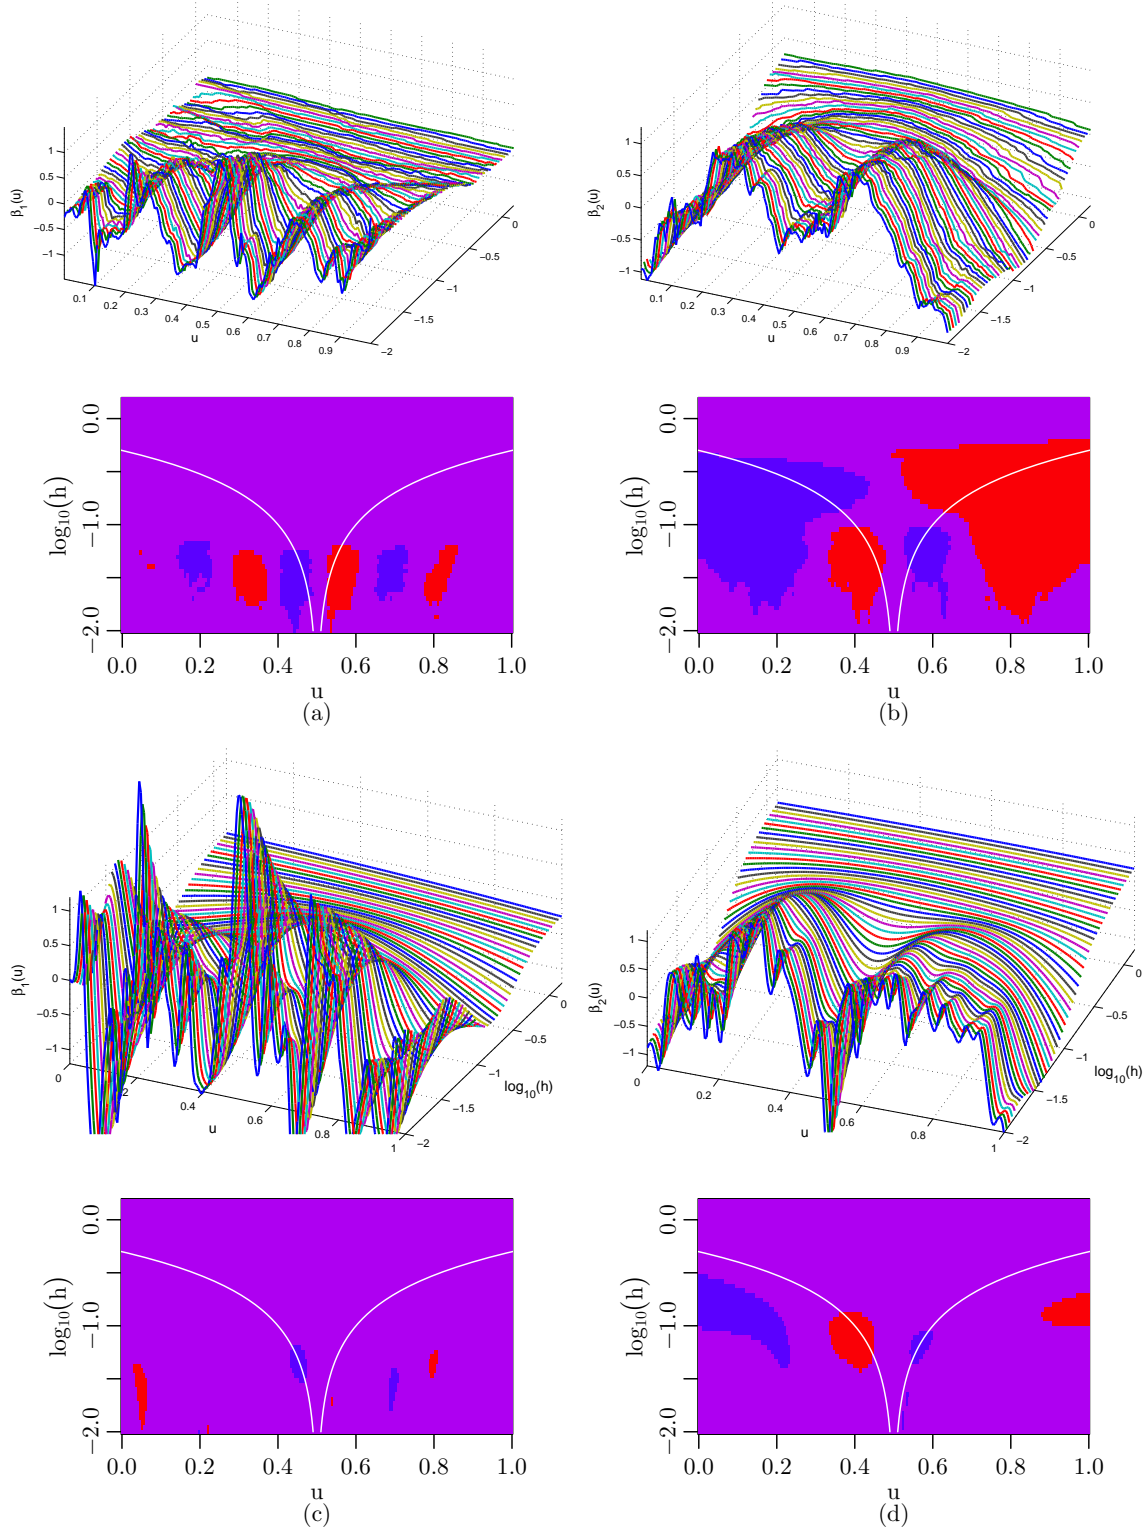

Figure S.9: Model errors drawn from the contaminated normal distribution  $0.7N(0, 0.5^2) + 0.3N(0, 16^2)$  in the varying coefficient model, the robust SiZer maps of (a)  $\beta_1(u)$  and (b)  $\beta_2(u)$  in Group 3, and the local least-square-based SiZer map of (c)  $\beta_1(u)$  and (d)  $\beta_2(u)$  in Group 3 .
